# Supplementary material
Source: HighWire-hosted journal article supplement (http://www.cmajopen.ca/highwire/filestream/86693/field_highwire_adjunct_files/1/2020-0228_Reviewer_comments.pdf)
Supplement: 2020-0228_Reviewer_comments.pdf [file 2020-0228_Reviewer_comments.pdf]

| <b>Article details: 2020-0228</b>          |                                                                                                                                                                                                                                                                                                                                                                                                                                                                                                                                                                                                                                                                                                                                                                                                                                                                                                                                                                                                                                                                                                                                                                                                                                                                                                                                                                                                                                                                                                            |
|--------------------------------------------|------------------------------------------------------------------------------------------------------------------------------------------------------------------------------------------------------------------------------------------------------------------------------------------------------------------------------------------------------------------------------------------------------------------------------------------------------------------------------------------------------------------------------------------------------------------------------------------------------------------------------------------------------------------------------------------------------------------------------------------------------------------------------------------------------------------------------------------------------------------------------------------------------------------------------------------------------------------------------------------------------------------------------------------------------------------------------------------------------------------------------------------------------------------------------------------------------------------------------------------------------------------------------------------------------------------------------------------------------------------------------------------------------------------------------------------------------------------------------------------------------------|
| Title                                      | Building the What Comes Next Cohort for <i>BRCA1</i> and <i>BRCA2</i> testing: a descriptive analysis                                                                                                                                                                                                                                                                                                                                                                                                                                                                                                                                                                                                                                                                                                                                                                                                                                                                                                                                                                                                                                                                                                                                                                                                                                                                                                                                                                                                      |
| Authors                                    | Fahima Dossa MD, Kelly Metcalfe PhD, Rinku Sutradhar PhD, Tari Little BSc, Andrea Eisen MD, Kathy Chun PhD, Wendy S. Meschino MD, Lea Velsher MD, Jordan Lerner Ellis PhD, Nancy N. Baxter MD PhD                                                                                                                                                                                                                                                                                                                                                                                                                                                                                                                                                                                                                                                                                                                                                                                                                                                                                                                                                                                                                                                                                                                                                                                                                                                                                                          |
| <b>Reviewer 1</b>                          | Jovana Cvetkovic                                                                                                                                                                                                                                                                                                                                                                                                                                                                                                                                                                                                                                                                                                                                                                                                                                                                                                                                                                                                                                                                                                                                                                                                                                                                                                                                                                                                                                                                                           |
| Institution                                | Medicinski fakultet, Univerzitet u Pristini, Kosovska Mitrovica, Serbia                                                                                                                                                                                                                                                                                                                                                                                                                                                                                                                                                                                                                                                                                                                                                                                                                                                                                                                                                                                                                                                                                                                                                                                                                                                                                                                                                                                                                                    |
| General comments (author response in bold) | The topic is very interesting and detailed<br><b>We thank the reviewer for this comment</b>                                                                                                                                                                                                                                                                                                                                                                                                                                                                                                                                                                                                                                                                                                                                                                                                                                                                                                                                                                                                                                                                                                                                                                                                                                                                                                                                                                                                                |
| <b>Reviewer 2</b>                          | Lissa Cohen                                                                                                                                                                                                                                                                                                                                                                                                                                                                                                                                                                                                                                                                                                                                                                                                                                                                                                                                                                                                                                                                                                                                                                                                                                                                                                                                                                                                                                                                                                |
| Institution                                |                                                                                                                                                                                                                                                                                                                                                                                                                                                                                                                                                                                                                                                                                                                                                                                                                                                                                                                                                                                                                                                                                                                                                                                                                                                                                                                                                                                                                                                                                                            |
| General comments (author response in bold) | <p>This is a very important topic and interesting cohort to review. The WCNC will provide a plethora of potentially descriptive data going forward. Would love to see a paragraph at the end with more specific examples of future directions/research endeavours with this data/cohort. Otherwise great article, easy to read, succinct, and easy to follow.</p> <p><b>As suggested, we have added a paragraph to the discussion summarizing some of our future directions for this cohort.</b></p> <p><b>Discussion, pg 14: “Using this unique data platform, we hope to explore many of the remaining unanswered questions important for counselling women undergoing BRCA1/BRCA2 testing and help resolve ambiguity for physicians involved in shared decision-making. Ongoing and future projects seek to understand how decisions for prophylactic surgery are affected by timing of genetic testing; quantify the use of high-risk screening and surgery among women who receive VUS and negative results; provide estimates of lifetime cancer risk among VUS/negative women, with consideration of family history; better understand the implications for risk-reducing strategies on cancer incidence and survival; evaluate the use and efficacy of neoadjuvant therapy on women with BRCA1/BRCA2 variants; and better understand long-term side effects of treatments selected for BRCA-positive women (e.g. chemotherapy-related cardiotoxicity, long-term effects of oophorectomy).”</b></p> |
